# Supplementary material for: Elobixibat improves rectal sensation in patients with chronic constipation aged ≥60 years: a randomised placebo-controlled study
Source: PubMed Central journal article supplement — BMJ Open Gastroenterol. 2023 Nov 22;10(1):e001257. doi: 10.1136/bmjgast-2023-001257 (PMC10668193; doi:10.1136/bmjgast-2023-001257), 2023-11-22
Supplement: bmjgast-2023-001257supp001.pdf [file bmjgast-2023-001257supp001.pdf]

**Supplementary Table 1. Changes in rectal sensory thresholds in the two groups**

|           |            |                    | N | mean  | SD   | median | IQR           | P-value |
|-----------|------------|--------------------|---|-------|------|--------|---------------|---------|
| DDV (mL)  | elobixibat | Observation period | 9 | 115.8 | 36.1 | 103.0  | 93.0 – 143.0  |         |
|           |            | Treatment period   | 9 | 100.6 | 40.8 | 75.0   | 74.0 – 138.0  |         |
|           |            | Difference         | 9 | -15.2 | 19.0 | -11.0  | -29.0 – -5.0  | 0.0433  |
|           |            |                    |   |       |      |        |               |         |
|           | placebo    | Observation period | 8 | 117.9 | 54.7 | 121.0  | 72.5 – 170.0  |         |
|           |            | Treatment period   | 8 | 118.6 | 64.0 | 138.0  | 50.0 – 174.5  |         |
|           |            | Difference         | 8 | 0.8   | 18.8 | 3.0    | -6.0 – 13.5   | 0.9131  |
|           |            |                    |   |       |      |        |               |         |
| FCSV (mL) | elobixibat | Observation period | 9 | 89.2  | 41.2 | 71.0   | 69.0 – 83.0   |         |
|           |            | Treatment period   | 9 | 63.2  | 27.4 | 55.0   | 51.0 – 65.0   |         |
|           |            | Difference         | 9 | -26.0 | 16.9 | -19.0  | -36.0 – -16.0 | 0.0017  |
|           |            |                    |   |       |      |        |               |         |
|           | placebo    | Observation period | 8 | 77.9  | 48.1 | 80.5   | 32.0 – 111.0  |         |
|           |            | Treatment period   | 8 | 84.9  | 61.9 | 94.0   | 18.5 – 131.5  |         |
|           |            | Difference         | 8 | 7.0   | 24.1 | -1.5   | -11.0 – 27.0  | 0.4385  |
|           |            |                    |   |       |      |        |               |         |
| MTV (mL)  | elobixibat | Observation period | 9 | 161.9 | 43.6 | 167.0  | 125.0 – 175.0 |         |
|           |            | Treatment period   | 9 | 141.4 | 58.3 | 105.0  | 100.0 – 202.0 |         |
|           |            | Difference         | 9 | -20.4 | 30.2 | -12.0  | -36.0 – -8.0  | 0.0767  |
|           | placebo    | Observation period | 8 | 159.3 | 50.7 | 174.5  | 131.5 – 197.0 |         |
|           |            |                    |   |       |      |        |               |         |
|           |            |                    |   |       |      |        |               |         |

|            |   |       |      |       |         |        |
|------------|---|-------|------|-------|---------|--------|
| Treatment  | 8 | 148.1 | 56.9 | 163.0 | 104.5 – |        |
| period     |   |       |      |       | 196.0   |        |
| Difference | 8 | -11.1 | 23.4 | -2.0  | -9.5 –  | 0.2209 |
|            |   |       |      |       | -0.5    |        |

DDV, defaecatory desire volume; FCSV, first constant sensation volume; MTV, maximum tolerable volume.

**Supplementary Table 2. Faecal BA concentrations**

|                               |                    |            | N | mean   | SD    | median | IQR           | difference | 95% CI          | P-value |
|-------------------------------|--------------------|------------|---|--------|-------|--------|---------------|------------|-----------------|---------|
| CA<br>( $\mu\text{mol/g}$ )   | Observation period | elobixibat | 8 | 0.000  | 0.000 | 0.000  | 0.000 – 0.000 | –0.961     | –2.9474         | 0.3169  |
|                               |                    | placebo    | 8 | 0.961  | 2.619 | 0.000  | 0.000 – 0.125 |            | –1.0249         |         |
|                               | Treatment period   | elobixibat | 9 | 1.790  | 2.910 | 0.390  | 0.000 – 1.880 | 1.414      | –0.8213         | 0.1976  |
|                               |                    | placebo    | 8 | 0.376  | 0.546 | 0.000  | 0.000 – 0.820 | –3.6488    |                 |         |
|                               | Difference         | elobixibat | 8 | 1.011  | 1.856 | 0.225  | 0.000 – 1.155 | 1.596      | –0.7616         | 0.1685  |
|                               |                    | placebo    | 8 | –0.585 | 2.495 | 0.000  | 0.000 – 0.295 | –3.9541    |                 |         |
| CDCA<br>( $\mu\text{mol/g}$ ) | Observation period | elobixibat | 8 | 0.000  | 0.000 | 0.000  | 0.000 – 0.000 | –0.404     | –1.2395         | 0.3177  |
|                               |                    | placebo    | 8 | 0.404  | 1.102 | 0.000  | 0.000 – 0.050 |            | –0.4320         |         |
|                               | Treatment period   | elobixibat | 9 | 1.262  | 1.938 | 0.110  | 0.000 – 1.860 | 0.940      | –0.6098         | 0.2157  |
|                               |                    | placebo    | 8 | 0.323  | 0.710 | 0.000  | 0.000 – 0.270 | –2.4892    |                 |         |
|                               | Difference         | elobixibat | 8 | 0.790  | 1.414 | 0.080  | 0.000 – 1.120 | 0.871      | –0.5730         | 0.2166  |
|                               |                    | placebo    | 8 | –0.081 | 1.276 | 0.000  | 0.000 – 0.005 | –2.3155    |                 |         |
| DCA<br>( $\mu\text{mol/g}$ )  | Observation period | elobixibat | 8 | 1.423  | 0.991 | 1.135  | 0.955 – 1.620 | –0.228     | –1.513 – 1.0584 | 0.7100  |
|                               |                    | placebo    | 8 | 1.650  | 1.376 | 1.380  | 0.610 – 2.580 |            |                 |         |
|                               | Treatment period   | elobixibat | 9 | 7.318  | 4.557 | 7.850  | 3.150 – 9.980 | 5.927      | 2.3924 – 9.4607 | 0.0028  |
|                               |                    | placebo    | 8 | 1.391  | 1.102 | 1.255  | 0.435 – 2.385 |            |                 |         |

|                               |                       |            |   |        |       |        |                 |        |                   |        |
|-------------------------------|-----------------------|------------|---|--------|-------|--------|-----------------|--------|-------------------|--------|
|                               | Difference            | elobixibat | 8 | 5.563  | 4.565 | 5.115  | 1.985 – 8.145   | 5.821  | 2.2060 – 9.4365   | 0.0039 |
|                               |                       | placebo    | 8 | -0.259 | 1.376 | -0.100 | -0.885 – -0.640 |        |                   |        |
| UDCA<br>( $\mu\text{mol/g}$ ) | Observation<br>period | elobixibat | 8 | 0.000  | 0.000 | 0.000  | 0.000 – 0.000   | -0.134 | -0.394 – 0.1266   | 0.2892 |
|                               |                       | placebo    | 8 | 0.134  | 0.343 | 0.000  | 0.000 – 0.045   |        |                   |        |
|                               | Treatment<br>period   | elobixibat | 9 | 0.861  | 1.322 | 0.000  | 0.000 – 1.090   | 0.684  | -0.3493 – -1.7165 | 0.1788 |
|                               |                       | placebo    | 8 | 0.178  | 0.367 | 0.000  | 0.000 – 0.180   |        |                   |        |
|                               | Difference            | elobixibat | 8 | 0.509  | 0.848 | 0.000  | 0.000 – 0.860   | 0.465  | -0.1814 – -1.1114 | 0.1452 |
|                               |                       | placebo    | 8 | 0.044  | 0.084 | 0.000  | 0.000 – 0.055   |        |                   |        |
| HDCA<br>( $\mu\text{mol/g}$ ) | Observation<br>period | elobixibat | 8 | 0.0    | 0.0   | 0.0    | 0.0 – 0.0       | 0.0    | 0.0 – 0.0         | -      |
|                               |                       | placebo    | 8 | 0.0    | 0.0   | 0.0    | 0.0 – 0.0       |        |                   |        |
|                               | Treatment<br>period   | elobixibat | 9 | 0.0    | 0.0   | 0.0    | 0.0 – 0.0       | 0.0    | 0.0 – 0.0         | -      |
|                               |                       | placebo    | 8 | 0.0    | 0.0   | 0.0    | 0.0 – 0.0       |        |                   |        |
|                               | Difference            | elobixibat | 8 | 0.0    | 0.0   | 0.0    | 0.0 – 0.0       | 0.0    | 0.0 – 0.0         | -      |
|                               |                       | placebo    | 8 | 0.0    | 0.0   | 0.0    | 0.0 – 0.0       |        |                   |        |
| LCA<br>( $\mu\text{mol/g}$ )  | Observation<br>period | elobixibat | 8 | 2.005  | 1.638 | 1.420  | 1.065 – 2.165   | 0.728  | -0.7412 – -2.1962 | 0.3060 |
|                               |                       | placebo    | 8 | 1.278  | 1.330 | 1.330  | 0.335 – 2.045   |        |                   |        |
|                               | Treatment<br>period   | elobixibat | 9 | 2.202  | 2.410 | 2.410  | 1.270 – 2.630   | 0.811  | -0.4680 – -2.0899 | 0.1966 |
|                               |                       | placebo    | 8 | 1.391  | 0.910 | 0.910  | 0.335 – 2.610   |        |                   |        |

|                                    |                       |            |   |        |       |        |                   |        |                      |        |
|------------------------------------|-----------------------|------------|---|--------|-------|--------|-------------------|--------|----------------------|--------|
|                                    | Difference            | elobixibat | 8 | 0.031  | 0.105 | 0.105  | -0.290            | -0.083 | -1.5831              | 0.9078 |
|                                    |                       |            |   |        |       |        | -0.870            |        | -1.4181              |        |
|                                    |                       | placebo    | 8 | 0.114  | 0.095 | 0.095  | -0.470            |        |                      |        |
|                                    |                       |            |   |        |       |        | -0.690            |        |                      |        |
| DA<br>( $\mu\text{mol/g}$ )        | Observation<br>period | elobixibat | 8 | 0.0    | 0.0   | 0.0    | 0.0 –<br>0.0      | 0.0    | 0.0 – 0.0            | -      |
|                                    |                       | placebo    | 8 | 0.0    | 0.0   | 0.0    | 0.0 –<br>0.0      |        |                      |        |
|                                    | Treatment<br>period   | elobixibat | 9 | 0.0    | 0.0   | 0.0    | 0.0 –<br>0.0      | 0.0    | 0.0 – 0.0            | -      |
|                                    |                       | placebo    | 8 | 0.0    | 0.0   | 0.0    | 0.0 –<br>0.0      |        |                      |        |
|                                    | Difference            | elobixibat | 8 | 0.0    | 0.0   | 0.0    | 0.0 –<br>0.0      | 0.0    | 0.0 – 0.0            | -      |
|                                    |                       | placebo    | 8 | 0.0    | 0.0   | 0.0    | 0.0 –<br>0.0      |        |                      |        |
| isoUDCA<br>( $\mu\text{mol/g}$ )   | Observation<br>period | elobixibat | 8 | 0.0    | 0.0   | 0.0    | 0.0 –<br>0.0      | 0.0    | 0.0 – 0.0            | -      |
|                                    |                       | placebo    | 8 | 0.0    | 0.0   | 0.0    | 0.0 –<br>0.0      |        |                      |        |
|                                    | Treatment<br>period   | elobixibat | 9 | 0.0    | 0.0   | 0.0    | 0.0 –<br>0.0      | 0.0    | 0.0 – 0.0            | -      |
|                                    |                       | placebo    | 8 | 0.0    | 0.0   | 0.0    | 0.0 –<br>0.0      |        |                      |        |
|                                    | Difference            | elobixibat | 8 | 0.0    | 0.0   | 0.0    | 0.0 –<br>0.0      | 0.0    | 0.0 – 0.0            | -      |
|                                    |                       | placebo    | 8 | 0.0    | 0.0   | 0.0    | 0.0 –<br>0.0      |        |                      |        |
| Total BAs<br>( $\mu\text{mol/g}$ ) | Observation<br>period | elobixibat | 8 | 3.428  | 2.536 | 2.360  | 2.225 –<br>3.350  | -0.999 | -4.4137 –<br>-2.4162 | 0.5406 |
|                                    |                       | placebo    | 8 | 4.426  | 3.722 | 4.120  | 1.610 –<br>5.645  |        |                      |        |
|                                    | Treatment<br>period   | elobixibat | 9 | 13.433 | 9.839 | 11.880 | 4.090 –<br>19.530 | 9.775  | 2.1275 –<br>17.2416  | 0.0157 |
|                                    |                       | placebo    | 8 | 3.659  | 2.486 | 3.940  | 1.160 –<br>6.100  |        |                      |        |

|                                           |                       |            |       |        |        |         |         |          |          |        |
|-------------------------------------------|-----------------------|------------|-------|--------|--------|---------|---------|----------|----------|--------|
|                                           | Difference            | elobixibat | 8     | 7.904  | 7.901  | 5.945   | 1.695 – | 8.671    | 2.2249 – | 0.0120 |
|                                           |                       |            |       |        |        |         | 13.330  |          | 15.1176  |        |
|                                           |                       | placebo    | 8     | -0.768 | 3.137  | -0.055  | -1.710  |          |          |        |
|                                           |                       |            |       |        |        |         | -0.925  |          |          |        |
| primary<br>BAs<br>( $\mu\text{mol/g}$ )   | Observation<br>period | elobixibat | 8     | 0.000  | 0.000  | 0.000   | 0.000 – | -1.365   | -4.1869  | 0.3171 |
|                                           |                       |            |       |        |        |         | 0.000   |          | -1.4569  |        |
|                                           |                       | placebo    | 8     | 1.365  | 3.721  | 0.000   | 0.000 – |          |          |        |
|                                           |                       |            |       |        |        |         | 0.175   |          |          |        |
|                                           | Treatment<br>period   | elobixibat | 9     | 3.052  | 4.837  | 0.540   | 0.000 – | 2.353    | -1.4028  | 0.2016 |
|                                           |                       |            |       |        |        |         | 3.740   |          | -6.1097  |        |
|                                           |                       | placebo    | 8     | 0.699  | 1.203  | 0.000   | 0.000 – |          |          |        |
|                                           |                       |            |       |        |        |         | 1.090   |          |          |        |
| secondary<br>BAs<br>( $\mu\text{mol/g}$ ) | Observation<br>period | elobixibat | 8     | 3.428  | 2.536  | 2.360   | 2.225 – | 0.500    | -2.0805  | 0.6840 |
|                                           |                       |            |       |        |        |         | 3.350   |          | -3.0805  |        |
|                                           |                       | placebo    | 8     | 2.928  | 2.269  | 2.710   | 0.945 – |          |          |        |
|                                           |                       |            |       |        |        |         | 5.195   |          |          |        |
| Treatment<br>period                       | elobixibat            | 9          | 9.520 | 5.591  | 10.480 | 4.090 – | 6.738   | 2.1931 – | 0.0065   |        |
|                                           |                       |            |       |        |        | 13.510  |         | 11.2819  |          |        |
|                                           |                       | placebo    | 8     | 2.783  | 2.353  | 2.525   | 0.885 – |          |          |        |
|                                           |                       |            |       |        |        |         | 4.545   |          |          |        |
| Difference                                | elobixibat            | 8          | 5.594 | 5.530  | 3.475  | 1.695 – | 5.739   | 1.2522 – | 0.0158   |        |
|                                           |                       |            |       |        |        | 9.015   |         | 10.2253  |          |        |
|                                           |                       | placebo    | 8     | -0.145 | 2.103  | -0.350  | -1.710  |          |          |        |
|                                           |                       |            |       |        |        |         | -1.545  |          |          |        |

N, number; SD, standard deviation; IQR, interquartile range; CI, confidence interval; CA, cholic acid; CDCA, chenodeoxycholic acid; DCA, deoxycholic acid; UDCA, ursodeoxycholic acid; HDCA, hyodeoxycholic acid; LCA, lithocholic acid; DA, dehydrocholic acid; BAs, bile acids. Primary BAs = CA + CDCA; secondary BAs = DCA + LCA + UDCA.

**Supplementary Table 3. Summary of DDV in the participants with CC**

| Subgroup                             |            |                |                | N     | median        | IQR          | P-value |
|--------------------------------------|------------|----------------|----------------|-------|---------------|--------------|---------|
| Presence or absence of complications | presence   | elobixibat     | Baseline       | 4     | 98.0          | 77.0 – 123.0 | 0.1511  |
|                                      |            |                | Post-treatment | 4     | 74.0          | 68.0 – 106.0 |         |
|                                      |            |                | Difference     | 4     | -12.0         | -24.0 – 2.0  |         |
|                                      |            | placebo        | Baseline       | 2     | 104.5         | 41.0 – 168.0 |         |
|                                      |            |                | Post-treatment | 2     | 113.0         | 42.0 – 184.0 |         |
|                                      |            |                | Difference     | 2     | 8.5           | 1.0 – 16.0   |         |
|                                      | absence    | elobixibat     | Baseline       | 5     | 143.0         | 94.0 – 153.0 | 0.1892  |
|                                      |            |                | Post-treatment | 5     | 126.0         | 75.0 – 146.0 |         |
|                                      |            |                | Difference     | 5     | -11.0         | -40.0 – 7.0  |         |
|                                      |            | placebo        | Baseline       | 6     | 121.0         | 96.0 – 172.0 |         |
|                                      |            |                | Post-treatment | 6     | 138.0         | 58.0 – 172.0 |         |
|                                      |            |                | Difference     | 6     | 1.0           | -9.0 – 11.0  |         |
| Age classification < 65 years        | elobixibat | Baseline       | 2              | 159.5 | 153.0 – 166.0 | 0.3897       |         |
|                                      |            | Post-treatment | 2              | 136.0 | 126.0 – 146.0 |              |         |
|                                      |            | Difference     | 2              | -23.5 | -40.0 – 7.0   |              |         |
|                                      | placebo    | Baseline       | 2              | 132.0 | 96.0 – 168.0  |              |         |

|                                          |                |            |                |             |              |               |        |
|------------------------------------------|----------------|------------|----------------|-------------|--------------|---------------|--------|
|                                          |                |            | Post-treatment | 2           | 121.0        | 58.0 – 184.0  |        |
|                                          |                |            | Difference     | 2           | -11.0        | -38.0 – 16.0  | 0.7537 |
|                                          | ≥65 years      | elobixibat | Baseline       | 7           | 103.3        | 86.0 – 143.0  |        |
|                                          |                |            | Post-treatment | 7           | 90.4         | 62.0 – 138.0  |        |
|                                          |                |            | Difference     | 7           | -11.0        | -38.0 – 16.0  | 0.7537 |
|                                          |                | placebo    | Baseline       | 6           | 121.0        | 49.0 – 172.0  |        |
|                                          |                |            | Post-treatment | 6           | 138.0        | 42.0 – 172.0  |        |
|                                          |                |            | Difference     | 6           | 3.0          | -3.0 – 11.0   | 0.3571 |
| Presence or absence of defecation desire | presence       | elobixibat | Baseline       | 9           | 103.0        | 93.0 – 143.0  |        |
|                                          |                |            | Post-treatment | 9           | 75.0         | 74.0 – 138.0  |        |
|                                          |                |            | Difference     | 9           | -11.0        | -29.0 – 5.0   | 0.0433 |
|                                          |                | placebo    | Baseline       | 7           | 98.0         | 49.0 – 172.0  |        |
|                                          | Post-treatment |            | 7              | 109.0       | 42.0 – 177.0 |               |        |
|                                          |                | Difference | 7              | 1.0         | -9.0 – 11.0  | 0.7301        |        |
|                                          | absence        | placebo    | Baseline       | 1           | 144.0        | 144.0 – 144.0 |        |
|                                          |                |            | Post-treatment | 1           | 167.0        | 167.0 – 167.0 |        |
|                                          | Difference     | 1          | 23.0           | 23.0 – 23.0 | -            |               |        |
| Sex                                      | Men            | elobixibat | Baseline       | 5           | 143.0        | 93.0 – 143.0  |        |



|                |            |            |                |   |       |               |        |
|----------------|------------|------------|----------------|---|-------|---------------|--------|
|                |            |            | Post-treatment | 5 | 126.0 | 75.0 – 138.0  |        |
|                |            |            | Difference     | 5 | -11.0 | -19.0 – 5.0   | 0.2523 |
|                | placebo    |            | Baseline       | 4 | 156.0 | 120.0 – 171.5 |        |
|                |            |            | Post-treatment | 4 | 169.5 | 112.5 – 178.0 |        |
|                |            |            | Difference     | 4 | 6.5   | -20.5 – 19.5  | 0.9731 |
| Women          | elobixibat |            | Baseline       | 4 | 98.5  | 77.5 – 128.0  |        |
|                |            |            | Post-treatment | 4 | 68.0  | 57.0 – 110.0  |        |
|                |            |            | Difference     | 4 | -18.0 | -35.5 – 3.0   | 0.1467 |
|                | placebo    |            | Baseline       | 4 | 73.5  | 45.0 – 135.0  |        |
|                |            |            | Post-treatment | 4 | 75.5  | 41.0 – 143.0  |        |
|                |            |            | Difference     | 4 | 3.0   | -4.0 – 8.0    | 0.6667 |
| Duration of CC | < 5 years  | elobixibat | Baseline       | 2 | 118.0 | 93.0 – 143.0  |        |
|                |            |            | Post-treatment | 2 | 106.0 | 74.0 – 138.0  |        |
|                |            |            | Difference     | 2 | -12.0 | -19.0 – 5.0   | 0.3362 |
|                |            | placebo    | Baseline       | 2 | 135.5 | 96.0 – 175.0  |        |
|                |            |            | Post-treatment | 2 | 115.0 | 58.0 – 172.0  |        |
|                |            |            | Difference     | 2 | -20.5 | -38.0 – 3.0   | 0.4498 |
|                | ≥ 5 years  | elobixibat | Baseline       | 6 | 123.0 | 94.0 – 153.0  |        |

|                             |          |            |                |   |       |               |        |
|-----------------------------|----------|------------|----------------|---|-------|---------------|--------|
|                             |          |            | Post-treatment | 6 | 100.0 | 62.0 – 146.0  |        |
|                             |          |            | Difference     | 6 | -18.0 | -40.0 – 1.0   | 0.1357 |
|                             |          | placebo    | Baseline       | 6 | 121.0 | 49.0 – 168.0  |        |
|                             |          |            | Post-treatment | 6 | 138.0 | 42.0 – 177.0  |        |
|                             |          |            | Difference     | 6 | 8.0   | 1.0 – 16.0    | 0.1519 |
| History of treatment for CC | positive | elobixibat | Baseline       | 3 | 143.0 | 61.0 – 153.0  |        |
|                             |          |            | Post-treatment | 3 | 138.0 | 62.0 – 146.0  |        |
|                             |          |            | Difference     | 3 | -5.0  | -7.0 – 1.0    | 0.2667 |
|                             |          | placebo    | Baseline       | 2 | 133.0 | 98.0 – 168.0  |        |
|                             |          |            | Post-treatment | 2 | 146.5 | 109.0 – 184.0 |        |
|                             |          |            | Difference     | 2 | 13.5  | 11.0 – 16.0   | 0.1166 |
|                             | negative | elobixibat | Baseline       | 6 | 98.5  | 93.0 – 143.0  |        |
|                             |          |            | Post-treatment | 6 | 74.5  | 74.0 – 126.0  |        |
|                             |          |            | Difference     | 6 | -24.0 | -40.0 – 11.0  | 0.0604 |
|                             |          | placebo    | Baseline       | 6 | 120.0 | 49.0 – 172.0  |        |
|                             |          |            | Post-treatment | 6 | 112.5 | 42.0 – 172.0  |        |
|                             |          |            | Difference     | 6 | -1.0  | -9.0 – 5.0    | 0.6871 |

DDV, defaecatory desire volume; CC, chronic constipation; IQR, interquartile range. Change in DDV = DDV after 7 days of treatment – DDV before the treatment. Between-group difference = value for elobixibat group – value for placebo group.
